# Supplementary material
Source: PubMed Central journal article supplement (PMC4742979)
Supplement: Supp_Fig1.pdf [file Supp_Fig1.pdf]

## Supplementary Data

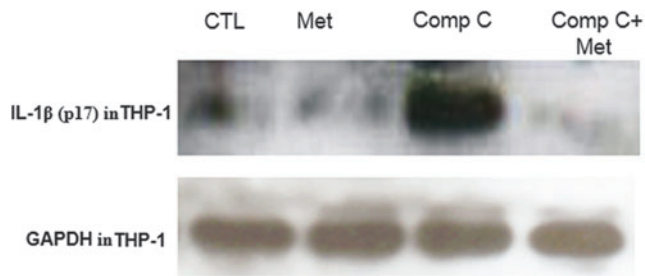

**SUPPLEMENTARY FIG. S1.** Quantification of active IL-1 $\beta$  (p17) protein levels after Compound C and metformin treatment in THP-1 cells.
