# Supplementary material
Source: PubMed Central journal article supplement (PMC4742979)
Supplement: Supp_Fig2.pdf [file Supp_Fig2.pdf]

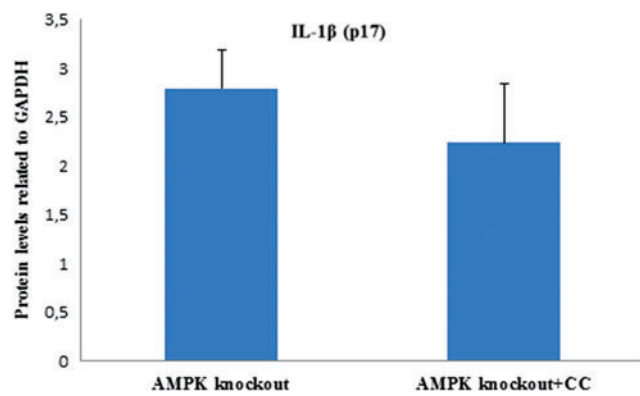

**SUPPLEMENTARY FIG. S2.** Quantification of active IL-1 $\beta$  (p17) protein levels in AMPK knockout skin fibroblasts after compound C treatment.
